# Supplementary material for: Interligand Charge-Transfer Processes in Zinc Complexes
Source: MDPI journal article supplement (doi:10.3390/chemistry4030051), 2022-07-21
Supplement: s1 [file s1]

Archive with 1 entries (1 files):
- chemistry-1820708-Supplementary.pdf
