# Supplementary material for: Interligand Charge-Transfer Processes in Zinc Complexes
Source: MDPI journal article supplement (doi:10.3390/chemistry4030051), 2022-07-21
Supplement: s1 [file s1 › chemistry-1820708-Supplementary.pdf]

# Interligand Charge-Transfer Processes in Zinc Complexes

Carlo Ciarrocchi, Guido Colucci, Massimo Boiocchi, Donatella Sacchi, Maduka L. Weththimuni, Alessio Orbelli Biroli and Maurizio Licchelli

## Supplementary Materials

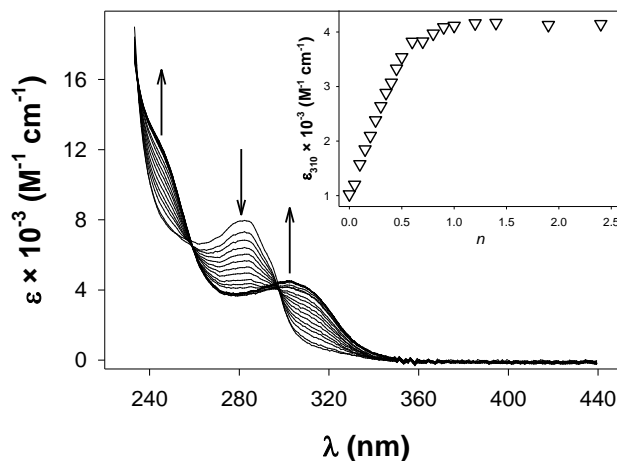

**Figure S1.** Absorption spectra recorded during the titration of a MeCN solution of **3b** ( $10^{-5}$  M) with zinc(II) ion. Titration profile in the inset ( $n$ = equiv of  $\text{Zn}^{\text{II}}$  ion/equiv of **3b**).

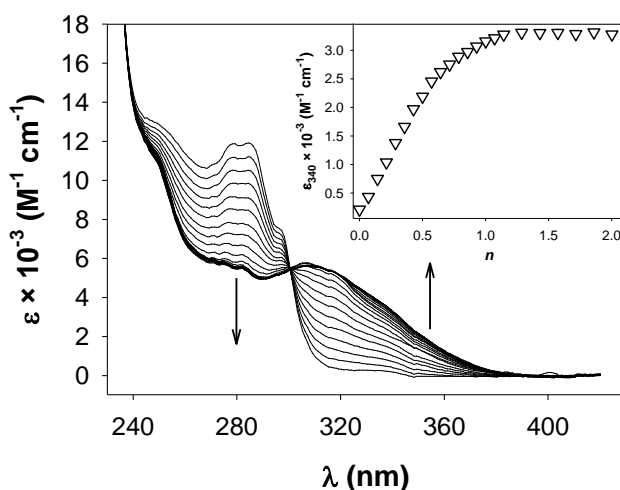

**Figure S2.** Absorption spectra recorded during the titration of a MeCN solution of **4a** ( $10^{-5}$  M) with zinc(II) ion. In the inset, titration profile shows the formation of a 1:1 adduct ( $n$ = equiv of  $\text{Zn}^{\text{II}}$  ion/equiv of **4a**).

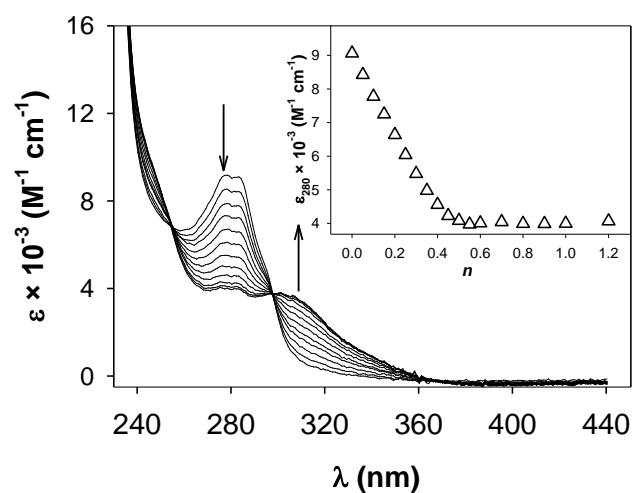

**Figure S3.** Absorption spectra recorded during the titration of a MeCN solution of **4b** ( $10^{-5}$  M) with zinc(II) ion. In the inset, titration profile shows the formation of a 1:1 adduct ( $n$ = equiv of  $\text{Zn}^{\text{II}}$  ion/equiv of **4b**).

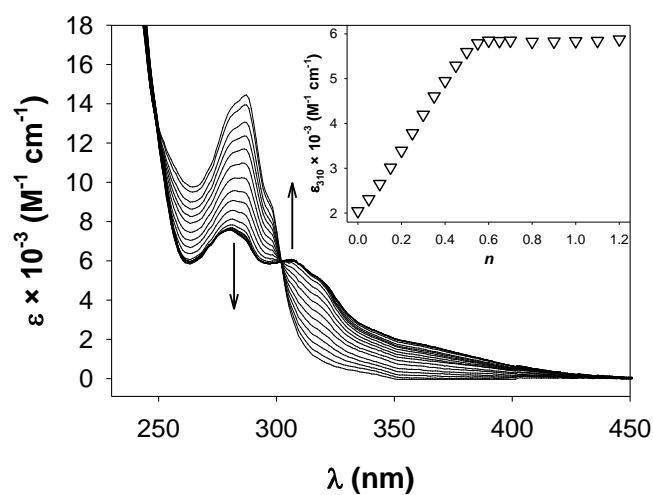

**Figure S4.** Absorption spectra recorded during the titration of a MeCN solution of **5a** ( $10^{-5}$  M) with zinc(II) ion. In the inset, titration profile shows the formation of a 1:1 adduct ( $n$ = equiv of  $\text{Zn}^{\text{II}}$  ion/equiv of **5a**).

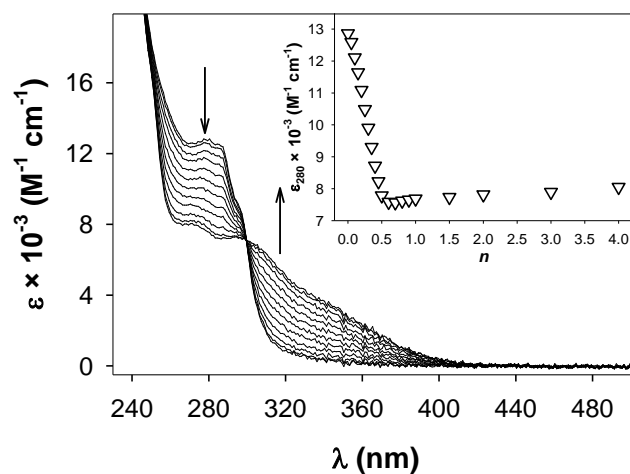

**Figure S5.** Absorption spectra recorded during the titration of a MeCN solution of **6a** ( $10^{-5}$  M) with zinc(II) ion. In the inset, titration profile shows the formation of a 1:1 adduct ( $n$ = equiv of  $\text{Zn}^{\text{II}}$  ion/equiv of **6a**).

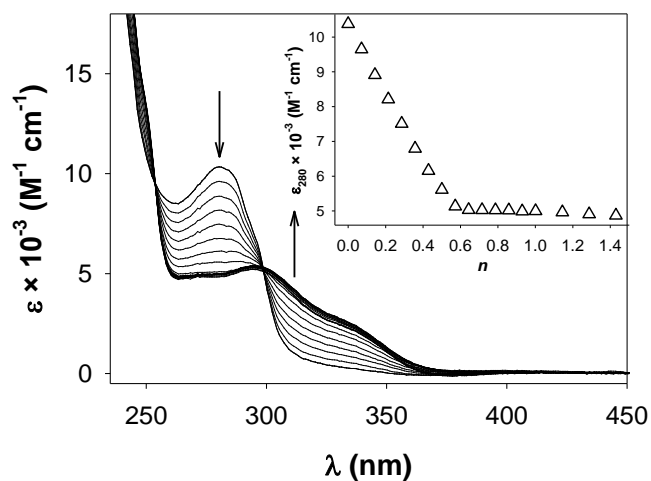

**Figure S6.** Absorption spectra recorded during the titration of a MeCN solution of **6b** ( $10^{-5}$  M) with zinc(II) ion. In the inset, titration profile shows the formation of a 1:1 adduct ( $n$ = equiv of  $\text{Zn}^{\text{II}}$  ion/equiv of **6b**).

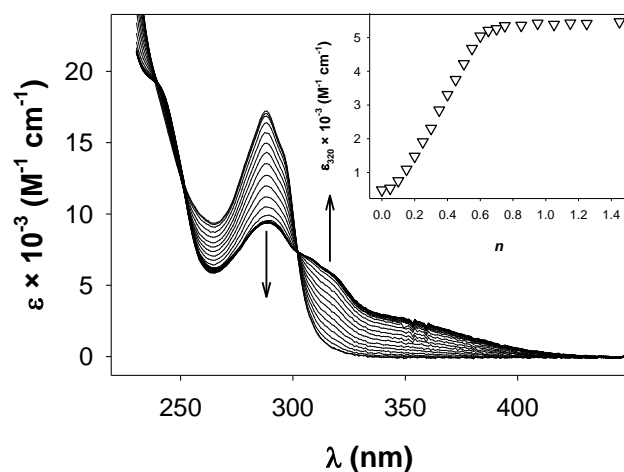

**Figure S7.** Absorption spectra recorded during the titration of a MeCN solution of **8a** ( $10^{-5}$  M) with zinc(II) ion. In the inset, titration profile shows the formation of a 1:1 adduct ( $n$ = equiv of  $\text{Zn}^{\text{II}}$  ion/equiv of **8a**).

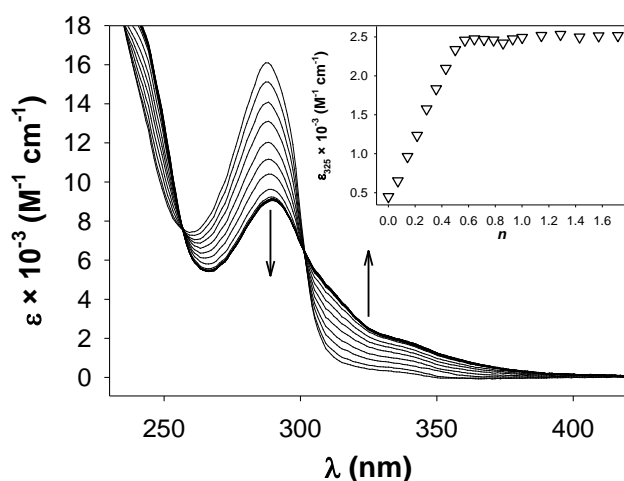

**Figure S8.** Absorption spectra recorded during the titration of a MeCN solution of **8b** ( $10^{-5}$  M) with zinc(II) ion. In the inset, titration profile shows the formation of a 1:1 adduct ( $n$ = equiv of  $\text{Zn}^{\text{II}}$  ion/equiv of **8b**).

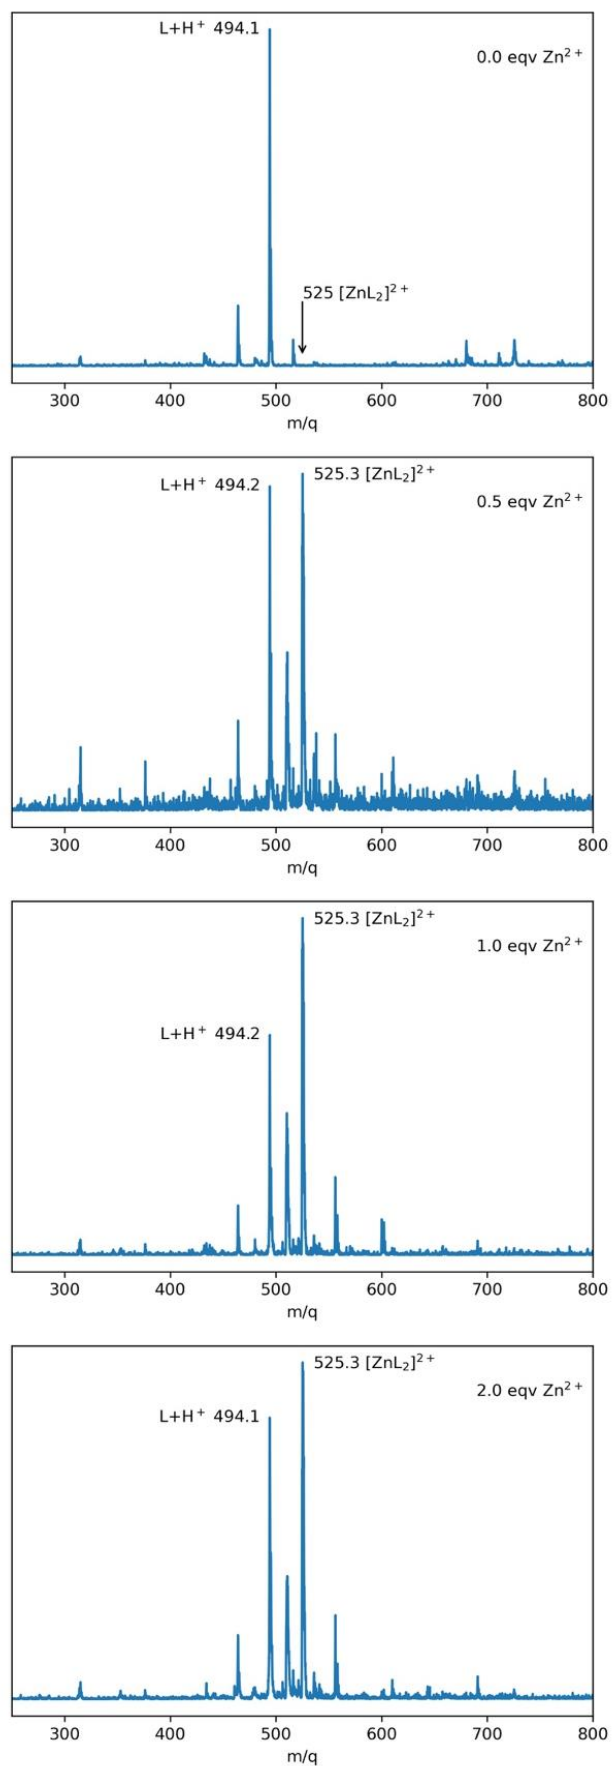

**Figure S9.** ESI-MS spectra measured on MeCN solutions of compound **7a** in the presence of increasing amount of zinc(II) trifluoromethanesulfonate ( $\text{L} = \mathbf{7a}$ ).

**Table S1.** Chemical shift observed for ligand **6a** and the corresponding zinc(II) complex.

| <i>protons</i> | <b>6a</b> | $[\text{Zn}(\mathbf{6a})_2]^{2+}$ |
|----------------|-----------|-----------------------------------|
| a              | 7.90      | 8.53                              |
| b              | 8.10      | 8.00                              |
| c              | 8.52      | 8.13                              |
| d              | 4.80      | 4.24                              |
| e              | 6.71      | 5.91                              |
| f              | 3.83      | 3.60                              |
| g              | 3.73      | 3.78                              |
